# Supplementary material for: Association of Adult Congenital Heart Disease With Pregnancy, Maternal, and Neonatal Outcomes
Source: PubMed Central journal article supplement (PMC6512464; doi:10.1001/jamanetworkopen.2019.3667), 2019-05-10
Supplement: jamanetwopen-2-e193667-s001.pdf [file jamanetwopen-2-e193667-s001.pdf]

## Supplementary Online Content

Ramage K, Grabowska K, Silversides C, Quan H, Metcalfe A. Association of adult congenital heart disease with pregnancy, maternal, and neonatal outcomes. *JAMA Netw Open*. 2019;2(5):e193667. doi:10.1001/jamanetworkopen.2019.3667

**eTable 1.** Anatomic and Clinical Classification of Congenital Heart Defects (ACC-CHD) With Description and *International Statistical Classification of Diseases and Related Health Problems, Tenth Revision (ICD-10)*, Code(s)

**eTable 2.** Diagnostic and Procedural Codes for the Maternal Morbidity Outcomes Indicator (MMOI)

**eTable 3.** Diagnostic and Procedural Codes for the Neonatal Adverse Outcomes Indicator (NAOI)

**eTable 4.** Major Visible Congenital Anomalies and Their Diagnostic Codes

**eTable 5.** Generalized Estimating Equations: Sensitivity Analyses of Potential Correlation Structures

**eReferences.**

This supplementary material has been provided by the authors to give readers additional information about their work.

**eTable 1. Anatomic and Clinical Classification of Congenital Heart Defects (ACC-CHD) With Description and *International Statistical Classification of Diseases and Related Health Problems, Tenth Revision (ICD-10)*, Code(s)**

| ACC-CHD Classification                                             | Description                                                                                                                                                                                                                                                                                                                                                                                                                                                                                                                                                                                                                                                                                                                                                                                                                                                                                                                                                                                                                        | ICD-10 Code(s)                                                                                                                                                                                     |
|--------------------------------------------------------------------|------------------------------------------------------------------------------------------------------------------------------------------------------------------------------------------------------------------------------------------------------------------------------------------------------------------------------------------------------------------------------------------------------------------------------------------------------------------------------------------------------------------------------------------------------------------------------------------------------------------------------------------------------------------------------------------------------------------------------------------------------------------------------------------------------------------------------------------------------------------------------------------------------------------------------------------------------------------------------------------------------------------------------------|----------------------------------------------------------------------------------------------------------------------------------------------------------------------------------------------------|
| <b>Heterotaxy, including isomerism and mirror-imagery</b>          | Heterotaxy syndromes (heterotaxia syndrome, visceral heterotaxy: abnormal arrangement of thoraco-abdominal organs)                                                                                                                                                                                                                                                                                                                                                                                                                                                                                                                                                                                                                                                                                                                                                                                                                                                                                                                 | Q89.3                                                                                                                                                                                              |
|                                                                    | Isomerism of atrial appendages (left and right)                                                                                                                                                                                                                                                                                                                                                                                                                                                                                                                                                                                                                                                                                                                                                                                                                                                                                                                                                                                    | Q20.6                                                                                                                                                                                              |
|                                                                    | Situs inversus (mirror-imaged arrangement)                                                                                                                                                                                                                                                                                                                                                                                                                                                                                                                                                                                                                                                                                                                                                                                                                                                                                                                                                                                         | Q89.3                                                                                                                                                                                              |
| <b>Anomalies of the venous return</b>                              | <p>Anomalies of the systemic venous return (congenital):</p> <ul style="list-style-type: none"> <li>• Congenital anomaly of the superior vena cava (SVC) <ul style="list-style-type: none"> <li>○ absent right SVC</li> <li>○ retro-aortic innominate vein</li> <li>○ left SVC persisting to coronary sinus</li> <li>○ left SVC persisting to left-sided atrium</li> </ul> </li> <li>• Congenital anomaly of the coronary sinus <ul style="list-style-type: none"> <li>○ partially unroofed coronary sinus</li> <li>○ totally unroofed coronary sinus</li> <li>○ coronary sinus orifice atretic</li> </ul> </li> <li>• Congenital anomaly of the inferior vena cava (IVC) <ul style="list-style-type: none"> <li>○ azygos continuation of the IVC</li> <li>○ right-sided azygos continuation of the IVC</li> <li>○ left-sided azygos continuation of the IVC</li> </ul> </li> <li>• Congenital anomaly of the hepatic veins <ul style="list-style-type: none"> <li>○ separate hepatic and IVC venous return</li> </ul> </li> </ul> | <p>Q26.9</p> <p>Q26.8</p> <p>Q26.9</p> <p>Q26.1</p> <p>Q26.1</p> <p>Q21.1</p> <p>Q21.1</p> <p>Q21.1</p> <p>Q21.1</p> <p>Q26.9</p> <p>Q26.8</p> <p>Q26.8</p> <p>Q26.8</p> <p>Q26.8</p> <p>Q26.8</p> |
|                                                                    | <p>Anomalies of the pulmonary venous connections:</p> <ul style="list-style-type: none"> <li>• Anomalous pulmonary venous connection <ul style="list-style-type: none"> <li>○ totally (supracardiac, intracardiac, infracardiac, or mixed)</li> <li>○ partially</li> </ul> </li> <li>• Congenital pulmonary vein stenosis</li> <li>• Congenital pulmonary vein hypoplasia</li> <li>• Pulmonary vein(s) atresia</li> <li>• Scimitar syndrome</li> </ul>                                                                                                                                                                                                                                                                                                                                                                                                                                                                                                                                                                             | <p>Q26.4,</p> <p>Q26.2,</p> <p>Q26.3</p> <p>Q26.8</p> <p>Q26.8</p> <p>Q26.8</p> <p>Q26.8</p>                                                                                                       |
| <b>Anomalies of the atria and interatrial communications (IAC)</b> | Cor triatriatum:                                                                                                                                                                                                                                                                                                                                                                                                                                                                                                                                                                                                                                                                                                                                                                                                                                                                                                                                                                                                                   | Q24.2                                                                                                                                                                                              |
|                                                                    | • Cor triatriatum dexter (obstructive Eustachian valve)                                                                                                                                                                                                                                                                                                                                                                                                                                                                                                                                                                                                                                                                                                                                                                                                                                                                                                                                                                            | Q24.2                                                                                                                                                                                              |
|                                                                    | Interatrial Communications                                                                                                                                                                                                                                                                                                                                                                                                                                                                                                                                                                                                                                                                                                                                                                                                                                                                                                                                                                                                         | Q21.1                                                                                                                                                                                              |
|                                                                    | • Patent oval foramen                                                                                                                                                                                                                                                                                                                                                                                                                                                                                                                                                                                                                                                                                                                                                                                                                                                                                                                                                                                                              | Q21.1                                                                                                                                                                                              |
|                                                                    | • Ostium secundum type                                                                                                                                                                                                                                                                                                                                                                                                                                                                                                                                                                                                                                                                                                                                                                                                                                                                                                                                                                                                             | Q21.1                                                                                                                                                                                              |
| • Sinus venosus type (superior)                                    | Q21.1                                                                                                                                                                                                                                                                                                                                                                                                                                                                                                                                                                                                                                                                                                                                                                                                                                                                                                                                                                                                                              |                                                                                                                                                                                                    |
| • Coronary sinus type                                              | Q21.1                                                                                                                                                                                                                                                                                                                                                                                                                                                                                                                                                                                                                                                                                                                                                                                                                                                                                                                                                                                                                              |                                                                                                                                                                                                    |
| Juxtaposition of the atrial appendages (JAA)                       | Q20.8                                                                                                                                                                                                                                                                                                                                                                                                                                                                                                                                                                                                                                                                                                                                                                                                                                                                                                                                                                                                                              |                                                                                                                                                                                                    |

| ACC-CHD Classification                                                                           | Description                                                                                                                                                                                                                                                                                                                                                                                                                                                                                                                                                                                                                                                                               | ICD-10 Code(s)                                                                                                                                                           |
|--------------------------------------------------------------------------------------------------|-------------------------------------------------------------------------------------------------------------------------------------------------------------------------------------------------------------------------------------------------------------------------------------------------------------------------------------------------------------------------------------------------------------------------------------------------------------------------------------------------------------------------------------------------------------------------------------------------------------------------------------------------------------------------------------------|--------------------------------------------------------------------------------------------------------------------------------------------------------------------------|
|                                                                                                  | <ul style="list-style-type: none"> <li>• Left JAA</li> <li>• Right JAA</li> </ul>                                                                                                                                                                                                                                                                                                                                                                                                                                                                                                                                                                                                         | <p>Q20.8</p> <p>Q20.8</p>                                                                                                                                                |
| <p style="text-align: center;"><b>Anomalies of the Atrioventricular Junctions and Valves</b></p> | <p>Congenital anomalies of the tricuspid valve (TV)</p> <ul style="list-style-type: none"> <li>• Ebstein’s malformation <ul style="list-style-type: none"> <li>○ associated with discordant AV connections</li> </ul> </li> <li>• TV agenesis (unguarded tricuspid orifice)</li> <li>• Dysplastic tricuspid valve</li> <li>• Congenital tricuspid insufficiency</li> <li>• Cleft of the TV</li> <li>• Congenital valvar tricuspid stenosis</li> <li>• Tricuspid annular hypoplasia</li> <li>• Straddling TV</li> <li>• Overriding TV</li> <li>• Anomaly of the TV subvalvar apparatus</li> </ul>                                                                                          | <p>Q22.5</p> <p>Q22.5 +</p> <p>Q20.5</p> <p>Q22.9</p> <p>Q22.8</p> <p>Q22.8</p> <p>Q22.8</p> <p>Q22.4</p> <p>Q22.4</p> <p>Q22.8</p>                                      |
|                                                                                                  | <p>Congenital anomalies of the mitral valve (MV)</p> <ul style="list-style-type: none"> <li>• Dysplastic MV</li> <li>• Congenital mitral insufficiency</li> <li>• Isolated cleft of the MV (not AVSD type)</li> <li>• Congenital MV prolapse</li> <li>• Congenital mitral valvar stenosis</li> <li>• Supravalvar mitral ring</li> <li>• Mitral annular hyposplasia</li> <li>• Parachute MV</li> <li>• Double mitral orifice</li> <li>• Straddling MV</li> <li>• Overriding MV</li> <li>• Congenital anomaly of the MV subvalvar apparatus</li> <li>• Accessory mitral tissue</li> </ul>                                                                                                   | <p>Q23.8</p> <p>Q23.3</p> <p>Q23.9</p> <p>I34.1</p> <p>Q23.2</p> <p>Q20.8</p> <p>Q23.2</p> <p>Q23.8</p> <p>Q23.9</p> <p>Q23.8</p> <p>Q23.8</p> <p>Q23.8</p> <p>Q23.9</p> |
|                                                                                                  | <p>Atrioventricular septal defects (AVSD)</p> <ul style="list-style-type: none"> <li>• “Complete” AVSD (ventricular and atrial components with common AV orifice) <ul style="list-style-type: none"> <li>○ with left ventricular (LV) hypoplasia</li> <li>○ with right ventricular (RV) hypoplasia</li> <li>○ with Tetralogy of Fallot</li> </ul> </li> <li>• “Partial” AVSD <ul style="list-style-type: none"> <li>○ ostium primum type (atrial shunting only),</li> <li>○ “intermediate” or “transitional” type (atrial shunting and restrictive ventricular shunting)</li> <li>○ cleft of the left atrioventricular (AV) valve in AVSD (“mitral cleft” in AVSD)</li> </ul> </li> </ul> | <p>Q21.2</p> <p>Q21.2 +</p> <p>Q20.8</p> <p>Q21.2 +</p> <p>Q20.8</p> <p>Q21.1 +</p> <p>Q21.3</p> <p>Q21.2,</p> <p>Q23.9</p>                                              |

| ACC-CHD Classification                                   | Description                                                                                                                                                                                                                                                                                                                                                                                                                            | ICD-10 Code(s)                                     |  |
|----------------------------------------------------------|----------------------------------------------------------------------------------------------------------------------------------------------------------------------------------------------------------------------------------------------------------------------------------------------------------------------------------------------------------------------------------------------------------------------------------------|----------------------------------------------------|--|
|                                                          | <ul style="list-style-type: none"> <li>○ common atrium (virtual absence of atrial septum)</li> <li>○ isolated ventricular component (ventricular shunting only)</li> </ul>                                                                                                                                                                                                                                                             |                                                    |  |
| <b>Complex anomalies of atrioventricular connections</b> | Congenitally corrected transposition of the great arteries (double discordance)                                                                                                                                                                                                                                                                                                                                                        | Q20.5                                              |  |
|                                                          | Criss-cross atrioventricular connections                                                                                                                                                                                                                                                                                                                                                                                               | Q24.8                                              |  |
|                                                          | Supero-inferior ventricles                                                                                                                                                                                                                                                                                                                                                                                                             | Q24.8                                              |  |
| <b>Functionally univentricular hearts</b>                | Double-inlet ventricle (DIV) <ul style="list-style-type: none"> <li>• With 2 atrioventricular valves               <ul style="list-style-type: none"> <li>○ double-inlet right ventricle</li> <li>○ double-inlet left ventricle</li> </ul> </li> <li>• Right-sided AV valve in DIV atretic (imperforate)</li> <li>• Left-sided AV valve in DIV atretic (imperforate)</li> <li>• Common AV orifice in double-inlet ventricle</li> </ul> | Q20.4<br>Q20.4<br>Q20.4<br>Q20.4<br>Q20.4          |  |
|                                                          | Absence of one atrioventricular connection <ul style="list-style-type: none"> <li>• Absent left-sided AV connection (mitral atresia)</li> <li>• Absent right-sided AV connection (tricuspid atresia)</li> </ul>                                                                                                                                                                                                                        | Q23.2<br>Q22.4                                     |  |
|                                                          | Left ventricular (LV) hypoplasia <ul style="list-style-type: none"> <li>• Hypoplastic left heart syndrome</li> <li>• Mitral valve atretic (imperforate)</li> <li>• Ventricular imbalance with dominant RV and hypoplastic LV</li> </ul>                                                                                                                                                                                                | Q20.8<br>Q23.4<br>Q23.2<br>Q20.8                   |  |
|                                                          | Right ventricular (RV) hypoplasia <ul style="list-style-type: none"> <li>• Pulmonary atresia with intact ventricular septum</li> <li>• Tricuspid valve atretic (imperforate): congenital</li> <li>• Hypoplastic right heart syndrome</li> <li>• Ventricular imbalance with dominant LV and hypoplastic RV</li> <li>• Uhl's anomaly</li> </ul>                                                                                          | Q20.8<br>Q22.0<br>Q22.4<br>Q22.6<br>Q20.8<br>Q24.8 |  |
|                                                          |                                                                                                                                                                                                                                                                                                                                                                                                                                        |                                                    |  |
|                                                          |                                                                                                                                                                                                                                                                                                                                                                                                                                        |                                                    |  |
| <b>Ventricular septal defects (VSD)</b>                  | Perimembranous VSD                                                                                                                                                                                                                                                                                                                                                                                                                     | Q21.0                                              |  |
|                                                          | Perimembranous VSD, small                                                                                                                                                                                                                                                                                                                                                                                                              | Q21.0                                              |  |
|                                                          | Perimembranous VSD with posterior (inlet) extension                                                                                                                                                                                                                                                                                                                                                                                    | Q21.0                                              |  |
|                                                          | Malalignment (infundibular, conoventricular) VSD (with malaligned outlet (conal) septum) <ul style="list-style-type: none"> <li>• Anterior malalignment VSD (Fallot type)</li> <li>• Posterior malalignment VSD (aortic arch obstruction type)</li> </ul>                                                                                                                                                                              | Q21.0                                              |  |
|                                                          | Doubly committed (subarterial, conal) VSD                                                                                                                                                                                                                                                                                                                                                                                              | Q21.0                                              |  |
|                                                          | Muscular VSD                                                                                                                                                                                                                                                                                                                                                                                                                           | Q21.0                                              |  |
|                                                          | Muscular VSD, small                                                                                                                                                                                                                                                                                                                                                                                                                    | Q21.0                                              |  |
|                                                          | Inlet VSD, not associated with a common AV junction                                                                                                                                                                                                                                                                                                                                                                                    | Q21.0                                              |  |
|                                                          | Multiple VSDs                                                                                                                                                                                                                                                                                                                                                                                                                          | Q21.0                                              |  |
|                                                          | Associated with aortic insufficiency (Prolapsed aortic leaflet)                                                                                                                                                                                                                                                                                                                                                                        | Q21.0                                              |  |

| ACC-CHD Classification                                                               | Description                                                                                                                                                                                                                                                                                                                                                                                                                                                                                                                                                                                                                                                                                                                                                                                                                                                                                                                                        | ICD-10 Code(s)                                                                                                             |
|--------------------------------------------------------------------------------------|----------------------------------------------------------------------------------------------------------------------------------------------------------------------------------------------------------------------------------------------------------------------------------------------------------------------------------------------------------------------------------------------------------------------------------------------------------------------------------------------------------------------------------------------------------------------------------------------------------------------------------------------------------------------------------------------------------------------------------------------------------------------------------------------------------------------------------------------------------------------------------------------------------------------------------------------------|----------------------------------------------------------------------------------------------------------------------------|
| <b>Anomalies of the ventricular outflow tracts (ventriculo-arterial connections)</b> | Transposition of the great arteries (TGA) <ul style="list-style-type: none"> <li>• TGA with intact ventricular septum</li> <li>• TGA (discordant ventriculo-arterial connections)</li> </ul>                                                                                                                                                                                                                                                                                                                                                                                                                                                                                                                                                                                                                                                                                                                                                       | Q20.3<br>Q20.3                                                                                                             |
|                                                                                      | Other abnormal ventriculo-arterial (VA) connections <ul style="list-style-type: none"> <li>• Double outlet right ventricle (DORV)               <ul style="list-style-type: none"> <li>○ With subaortic VSD</li> <li>○ With sub-pulmonary VSD</li> <li>○ With non-committed VSD</li> <li>○ With doubly committed VSD</li> <li>○ With intact ventricular septum</li> <li>○ Fallot type (subaortic or double committed VSD + pulmonary stenosis)</li> </ul> </li> <li>• Double outlet left ventricle</li> <li>• Concordant VA connections with parallel great arteries (anatomically corrected malposition of the great arteries)</li> </ul>                                                                                                                                                                                                                                                                                                         | Q20.1<br>Q20.1<br>Q20.1<br>Q20.1<br>Q20.1<br>Q20.1<br>Q20.2<br>Q25.9                                                       |
|                                                                                      | Tetralogy of Fallot and variants <ul style="list-style-type: none"> <li>• Tetralogy of Fallot (TOF)</li> <li>• Tetralogy of Fallot with pulmonary atresia               <ul style="list-style-type: none"> <li>○ With MAPCAs (collaterals)</li> </ul> </li> <li>• Absent pulmonary valve syndrome               <ul style="list-style-type: none"> <li>○ With non-Fallot VSD</li> <li>○ With Fallot-type VSD</li> </ul> </li> </ul>                                                                                                                                                                                                                                                                                                                                                                                                                                                                                                                | Q21.3<br>Q22.0 +<br>Q21.0<br>Q22.0 +<br>Q21.0<br>Q22.3                                                                     |
|                                                                                      | Anomalies of the intrapericardial arterial trunks <ul style="list-style-type: none"> <li>• Common arterial trunk (truncus arteriosus)               <ul style="list-style-type: none"> <li>○ With common origin of PAs (type I)</li> <li>○ With separate origin of PAs (type II)</li> <li>○ With isolated (discontinuous PAs)</li> <li>○ With aortic arch obstruction</li> </ul> </li> <li>• Aorto-pulmonary window</li> <li>• Pulmonary artery (PA) from ascending aorta               <ul style="list-style-type: none"> <li>○ Right PA from ascending aorta</li> <li>○ Left PA from ascending aorta</li> </ul> </li> <li>• Anomalies of the ascending aorta               <ul style="list-style-type: none"> <li>○ Atresia of the ascending aorta</li> <li>○ Supravalvar aortic stenosis</li> <li>○ Aortic sinus of Valsalva aneurysm</li> <li>○ Aorto-left ventricular tunnel</li> </ul> </li> <li>• Supravalvar pulmonary stenosis</li> </ul> | Q20.0<br>Q20.0<br>Q20.0<br>Q20.0<br>Q20.0<br>Q21.4<br>Q25.7<br>Q25.7<br>Q25.7<br>Q25.2<br>Q25.3<br>Q25.4<br>Q25.4<br>Q25.6 |
|                                                                                      | Left ventricular outflow tract (LVOT) and aortic valvar anomalies <ul style="list-style-type: none"> <li>• Valvar aortic stenosis: congenital</li> <li>• Bicuspid aortic valve</li> </ul>                                                                                                                                                                                                                                                                                                                                                                                                                                                                                                                                                                                                                                                                                                                                                          | Q23.0                                                                                                                      |

| ACC-CHD Classification                                   | Description                                                                                                                                                                                                                                                                                                                                                                                                                                                                                                                                                                                                                            | ICD-10 Code(s)                                                                |
|----------------------------------------------------------|----------------------------------------------------------------------------------------------------------------------------------------------------------------------------------------------------------------------------------------------------------------------------------------------------------------------------------------------------------------------------------------------------------------------------------------------------------------------------------------------------------------------------------------------------------------------------------------------------------------------------------------|-------------------------------------------------------------------------------|
|                                                          | <ul style="list-style-type: none"> <li>• Dysplastic aortic valve</li> <li>• Aortic valve atresia</li> <li>• LVOT obstruction</li> <li>• Subvalvar aortic stenosis (fibromuscular tunnel)</li> <li>• Subaortic fibromuscular shelf</li> <li>• Congenital aortic insufficiency</li> </ul>                                                                                                                                                                                                                                                                                                                                                | Q23.1<br>Q23.8<br>Q23.0<br>Q24.4<br>Q24.4<br>Q24.4<br>Q23.1                   |
|                                                          | Right ventricular outflow tract (RVOT) and pulmonary valvar anomalies <ul style="list-style-type: none"> <li>• Pulmonary valvar stenosis: congenital</li> <li>• Dysplastic pulmonary valve</li> <li>• Bicuspid pulmonary valve</li> <li>• Pulmonary atresia with other CHD (with additional code for any associated lesion(s))</li> <li>• Subpulmonary stenosis               <ul style="list-style-type: none"> <li>○ RVOT obstruction (subpulmonary)</li> <li>○ Stenosis of mouth of the infundibulum</li> <li>○ RVOT obstruction due to malaligned outlet septum</li> </ul> </li> <li>• Double chambered right ventricle</li> </ul> | Q22.1<br>Q22.3<br>Q22.3<br>Q22.0<br>Q24.3<br>Q24.3<br>Q24.3<br>Q24.3<br>Q24.8 |
| <b>Anomalies of the extrapericardial arterial trunks</b> | Patent ductus arteriosus <ul style="list-style-type: none"> <li>• Patent ductus arteriosus, atypical (abnormal origin)</li> </ul>                                                                                                                                                                                                                                                                                                                                                                                                                                                                                                      | Q25.0<br>Q25.8                                                                |
|                                                          | Coarctation of the aorta <ul style="list-style-type: none"> <li>• Coarctation of the aorta, abdominal</li> <li>• Hypoplasia of the aortic arch (tubular)</li> </ul>                                                                                                                                                                                                                                                                                                                                                                                                                                                                    | Q25.1<br>Q25.1<br>Q25.4                                                       |
|                                                          | Interruption of the aortic arch <ul style="list-style-type: none"> <li>• Type A: distal to subclavian artery</li> <li>• Type B: between subclavian and common carotid</li> <li>• Type C: between carotid arteries</li> </ul>                                                                                                                                                                                                                                                                                                                                                                                                           | Q25.4<br>Q25.4<br>Q25.4<br>Q25.4                                              |
|                                                          | Anomalies of the aortic arches <ul style="list-style-type: none"> <li>• Right aortic arch</li> <li>• Cervical aortic arch</li> <li>• Aberrant origin subclavian artery               <ul style="list-style-type: none"> <li>○ Aberrant origin of right subclavian artery</li> <li>○ Aberrant origin of left subclavian artery</li> </ul> </li> <li>• Arterial duct from left innominate artery</li> <li>• Double aortic arch</li> <li>• Persistent fifth aortic arch</li> </ul>                                                                                                                                                        | Q25.4<br>Q25.4<br>Q27.8<br>Q27.8<br>Q27.8<br>Q27.8<br>Q25.4<br>Q25.4          |
|                                                          | Anomalies of the pulmonary artery (PA) and its branches <ul style="list-style-type: none"> <li>• Pulmonary arterial stenosis               <ul style="list-style-type: none"> <li>○ Right PA stenosis</li> <li>○ Left PA stenosis</li> </ul> </li> </ul>                                                                                                                                                                                                                                                                                                                                                                               | Q25.6<br>Q25.6<br>Q25.6                                                       |

| ACC-CHD Classification                               | Description                                                                                                                                                                                                                                                                                                                                                                                                                                                                                                                                                                                         | ICD-10 Code(s)                                                       |
|------------------------------------------------------|-----------------------------------------------------------------------------------------------------------------------------------------------------------------------------------------------------------------------------------------------------------------------------------------------------------------------------------------------------------------------------------------------------------------------------------------------------------------------------------------------------------------------------------------------------------------------------------------------------|----------------------------------------------------------------------|
|                                                      | <ul style="list-style-type: none"> <li>• Pulmonary arterial hypoplasia               <ul style="list-style-type: none"> <li>○ Right PA hypoplasia</li> <li>○ Left PA hypoplasia</li> </ul> </li> <li>• Pulmonary artery absent               <ul style="list-style-type: none"> <li>○ Right PA absent</li> <li>○ Left PA absent</li> </ul> </li> <li>• Pulmonary artery from patent arterial duct               <ul style="list-style-type: none"> <li>○ Right PA from patent arterial duct</li> <li>○ Left PA from patent arterial duct</li> </ul> </li> <li>• Pulmonary arterial sling</li> </ul> | Q25.7<br>Q25.7<br>Q25.7<br>Q25.7<br>Q25.7<br>Q25.7<br>Q25.7<br>Q25.7 |
| <b>Congenital anomalies of the coronary arteries</b> | Anomalous origin of left coronary artery from pulmonary artery (ALCAPA)                                                                                                                                                                                                                                                                                                                                                                                                                                                                                                                             | Q24.5                                                                |
|                                                      | Single coronary artery supplying all the heart                                                                                                                                                                                                                                                                                                                                                                                                                                                                                                                                                      | Q24.5                                                                |
|                                                      | Coronary orifice stenosis: congenital                                                                                                                                                                                                                                                                                                                                                                                                                                                                                                                                                               | Q24.5                                                                |
|                                                      | Coronary orifice atresia                                                                                                                                                                                                                                                                                                                                                                                                                                                                                                                                                                            | Q24.5                                                                |
|                                                      | Aberrant course of left anterior descending from right coronary artery across RVOT                                                                                                                                                                                                                                                                                                                                                                                                                                                                                                                  | Q24.5                                                                |
|                                                      | Right ventricular myocardial sinusoids                                                                                                                                                                                                                                                                                                                                                                                                                                                                                                                                                              | Q24.8                                                                |
|                                                      | Coronary artery fistula: congenital <ul style="list-style-type: none"> <li>• Coronary fistula to pulmonary artery</li> </ul>                                                                                                                                                                                                                                                                                                                                                                                                                                                                        | Q24.5<br>Q24.5                                                       |

Adapted from Houyel et al.<sup>1</sup>

**eTable 2. Diagnostic and Procedural Codes for the Maternal Morbidity Outcomes Indicator (MMOI)**

|                                             | <b>Maternal Morbidity Outcome</b>                   | <b>International Classification of Disease Version 10 Canadian Modification (ICD-10-CA) Codes</b>                                                                                                                                                                                                                                                                                        |
|---------------------------------------------|-----------------------------------------------------|------------------------------------------------------------------------------------------------------------------------------------------------------------------------------------------------------------------------------------------------------------------------------------------------------------------------------------------------------------------------------------------|
| <b>DIAGNOSES</b>                            | Acute Abdomen                                       | K35, K37, K65.0, K65.9, N73.3, N73.5                                                                                                                                                                                                                                                                                                                                                     |
|                                             | Acute Renal Failure                                 | O90.4, N17, N19, N99.0                                                                                                                                                                                                                                                                                                                                                                   |
|                                             | Acute Psychosis                                     | F23, F53.1                                                                                                                                                                                                                                                                                                                                                                               |
|                                             | Cardiac arrest, failure or infarction               | O89.1, O74.2, O90.3, I21, I42, I43, I46, I50, J81                                                                                                                                                                                                                                                                                                                                        |
|                                             | Cerebral oedema or coma                             | R40.2, G93.6                                                                                                                                                                                                                                                                                                                                                                             |
|                                             | Disseminated intravascular coagulopathy             | D65                                                                                                                                                                                                                                                                                                                                                                                      |
|                                             | Cerebrovascular accident                            | I61-I64                                                                                                                                                                                                                                                                                                                                                                                  |
|                                             | Major complications of anaesthesia                  | O29.0-O.292, O74.0, O74.2, O74.3, O.89.0-O89.2                                                                                                                                                                                                                                                                                                                                           |
|                                             | Obstetric embolism                                  | O88                                                                                                                                                                                                                                                                                                                                                                                      |
|                                             | Shock                                               | R57, O75.1, T80.5, T88.6                                                                                                                                                                                                                                                                                                                                                                 |
|                                             | Sickle cell anaemia with crisis                     | D57.0                                                                                                                                                                                                                                                                                                                                                                                    |
|                                             | Status asthmaticus                                  | J46                                                                                                                                                                                                                                                                                                                                                                                      |
|                                             | Status epilepticus                                  | G41                                                                                                                                                                                                                                                                                                                                                                                      |
|                                             | Uterine rupture                                     | O71.0, O71.1                                                                                                                                                                                                                                                                                                                                                                             |
| <b>PROCEDURES</b>                           | Assisted ventilation including tracheostomy         | 1.GZ.31, 1.GJ.77                                                                                                                                                                                                                                                                                                                                                                         |
|                                             | Curettage in combination with a general anaesthetic | 5.PC.91.GA, 5.PC.91.GC, 1.RM.87, 5.CA.89.GC, 5.CA.89.GA                                                                                                                                                                                                                                                                                                                                  |
|                                             | Dialysis                                            | 1.PZ.21, 1.CG.76, 1.OA.21                                                                                                                                                                                                                                                                                                                                                                |
|                                             | Evacuation of haematoma                             | 5.PC.73, 1.AA.52, 1.AB.52, 1.AB.87, 1.AF.52, 1.AN.52, 1.AX.52, 1.CZ.52, 1.DA.42, 1.EZ.52, 1.FA.52, 1.FH.52, 1.FR.52, 1.FX.52, 1.OJ.52, 1.OT.52, 1.PB.52, 1.PE.52, 1.QG.52, 1.RW.52, 1.RY.52, 1.SH.52, 1.SZ.52, 1.TX.52, 1.UY.52, 1.VX.52, 1.WV.52, q.YA.52, 1.YC.52, 1.YD.52, 1.YE.52, 1.YF.52, 1.YG.52, 1.YM.52, 1.YR.52, 1.YS.52, 1.YT.52, 1.YU.52, 1.YV.52, 1.YW.52, 1.YX.52, 1.YZ.52 |
|                                             | Hysterectomy                                        | 1.RM.87, 1.RM.89, 1.RM.91                                                                                                                                                                                                                                                                                                                                                                |
|                                             | Procedures to reduce blood flow to uterus           | 1.RM.13                                                                                                                                                                                                                                                                                                                                                                                  |
|                                             | Reclosure of disrupted caesarean section wound      | 5.PC.80.JK, 5.PC.80.JM, 5.PC.80.JH                                                                                                                                                                                                                                                                                                                                                       |
|                                             | Repair of bladder or cystostomy                     | 1.PM.80, 1.PM.52, 1.PG.50                                                                                                                                                                                                                                                                                                                                                                |
|                                             | Repair of intestine                                 | 1.NE.80, 1.NK.80, 1.NM.80                                                                                                                                                                                                                                                                                                                                                                |
|                                             | Repair ruptured or inverted uterus                  | 5.PC.91.HP, 5.PC.91.HQ, 1.RM.80                                                                                                                                                                                                                                                                                                                                                          |
| Transfusion of blood or coagulation factors | 1.LZ.19                                             |                                                                                                                                                                                                                                                                                                                                                                                          |

Adapted from Roberts et al.<sup>2</sup>



**eTable 3. Diagnostic and Procedural Codes for the Neonatal Adverse Outcomes Indicator (NAOI)**

|                                                             | Neonatal Outcome                                   | International Classification of Disease Version 10 Canadian Modification (ICD-10-CA) Codes |
|-------------------------------------------------------------|----------------------------------------------------|--------------------------------------------------------------------------------------------|
| <b>DIAGNOSES</b>                                            | Gestational age <32 weeks                          | -                                                                                          |
|                                                             | Birthweight <1500 grams                            | -                                                                                          |
|                                                             | Neonatal mortality                                 | -                                                                                          |
|                                                             | Respiratory Distress Syndrome                      | P22.0                                                                                      |
|                                                             | Seizure                                            | P90                                                                                        |
|                                                             | Intraventricular hemorrhage (grades 2, 3, or 4)    | P52.1, P52.2                                                                               |
|                                                             | Cerebral infarction                                | I63                                                                                        |
|                                                             | Periventricular leukomalacia                       | P91.2                                                                                      |
|                                                             | Birth trauma                                       | P10-P15                                                                                    |
|                                                             | Hypoxic ischemic encephalopathy                    | P91.6                                                                                      |
|                                                             | Necrotising enterocolitis                          | P77                                                                                        |
|                                                             | Bronchopulmonary dysplasia                         | P27.1                                                                                      |
|                                                             | Sepsis/septicaemia                                 | P36, A40, A41, A02.1, A22.7, A26.7, A32.7, A42.7, B37.7, O85                               |
|                                                             | Pneumonia                                          | J12-J18, P23                                                                               |
| Other respiratory: primary atelectasis, respiratory failure | J96, P22, P28                                      |                                                                                            |
| <b>PROCEDURES</b>                                           | Resuscitation                                      | 1.GZ.30                                                                                    |
|                                                             | Ventilary support (mechanical ventilation or CPAP) | 1.GZ.31                                                                                    |
|                                                             | Central venous or arterial catheter                | 1.IS.53, 1.KV.53                                                                           |
|                                                             | Transfusion of blood or blood products             | 1.LZ.19                                                                                    |
|                                                             | Pneumothorax requiring an intercostal catheter     | 1.GT.33                                                                                    |

Adapted from Lain et al.<sup>3</sup>

**eTable 4. Major Visible Congenital Anomalies and their Diagnostic Codes**

| <b>Major Visible Congenital Anomalies</b> | <b>International Classification of Disease Version 10 Canadian Modification (ICD-10-CA) Codes</b> |
|-------------------------------------------|---------------------------------------------------------------------------------------------------|
| Anencephaly                               | Q00.0                                                                                             |
| Cleft lip/palate                          | Q35.x, Q36.x, Q37.x                                                                               |
| Congenital diaphragmatic hernia           | Q79.0, Q79.1                                                                                      |
| Encephalocele                             | Q01.x                                                                                             |
| Gastroschisis                             | Q79.3                                                                                             |
| Hypospadias                               | Q54.x (except Q54.4)                                                                              |
| Omphalocele                               | Q79.2                                                                                             |
| Spina bifida                              | Q05.x                                                                                             |
| Reduction defects of upper limb           | Q71.x                                                                                             |
| Reduction defects of lower limb           | Q72.x                                                                                             |
| Reduction defects of unspecified limb     | Q73.x                                                                                             |
| Trisomy 21                                | Q90.x                                                                                             |

Adapted from Metcalfe et al.<sup>4</sup>

**eTable 5. Generalized Estimating Equations: Sensitivity Analyses of Potential Correlation Structures**

To determine the most appropriate correlation structure for use with the generalized estimating equations, we tested several of our primary outcomes using two different types of correlation structure: independent and exchangeable.

| Outcome                                     |                                                                                                                     | Correlation Structure |                   |
|---------------------------------------------|---------------------------------------------------------------------------------------------------------------------|-----------------------|-------------------|
|                                             |                                                                                                                     | Exchangeable          | Independent       |
| Maternal Morbidity Outcome Indicator (MMOI) | Unadjusted Odds Ratio (95% CI) for women with ACHD compared with women without ACHD                                 | 3.7<br>(3.0-4.6)*     | 3.7<br>(3.0-4.6)* |
|                                             | Adjusted Odds Ratio (95% CI) for women with ACHD compared with women without ACHD                                   | 2.7<br>(2.2-3.4)*     | 2.6<br>(2.1-3.2)* |
| Neonatal Adverse Outcomes Indicator (NAOI)  | Unadjusted Odds Ratio (95% CI) for infants born to women with ACHD compared with infants born to women without ACHD | 2.3<br>(2.0-2.6)*     | 2.3<br>(2.0-2.7)* |
|                                             | Adjusted Odds Ratio (95% CI) for infants born to women with ACHD compared with infants born to women without ACHD   | 1.8<br>(1.6-2.1)*     | 1.9<br>(1.6-2.2)* |
| Preterm Birth (<37 weeks gestation)         | Unadjusted Odds Ratio (95% CI) for infants born to women with ACHD compared with infants born to women without ACHD | 2.0<br>(1.7-2.2)*     | 2.0<br>(1.8-2.3)* |
|                                             | Adjusted Odds Ratio (95% CI) for infants born to women with ACHD compared with infants born to women without ACHD   | 1.5<br>(1.3-1.8)*     | 1.6<br>(1.4-1.9)* |

\* denotes significance at the p<0.05 level

Adjusted models have been controlled for mode of delivery, obstetric comorbidity, and year of delivery

## eReferences

1. Houyel L, Khoshnood B, Anderson RH, et al; EPICARD Study group. Population-based evaluation of a suggested anatomic and clinical classification of congenital heart defects based on the International Paediatric and Congenital Cardiac Code. *Orphanet J Rare Dis*. 2011;6:64. Medline:21968022
2. Roberts CL, Cameron CA, Bell JC, Algert CS, Morris JM. Measuring maternal morbidity in routinely collected health data: development and validation of a maternal morbidity outcome indicator. *Med Care*. 2008;46(8):786-794.
3. Lain SJ, Algert CS, Nassar N, Bowen JR, Roberts CL. Incidence of severe adverse neonatal outcomes: use of a composite indicator in a population cohort. *Matern Child Health J*. 2012;16(3):600-608.
4. Metcalfe A, Sibbald B, Lowry RB, Tough S, Bernier FP. Validation of congenital anomaly coding in Canada's administrative databases compared with a congenital anomaly registry. *Birth Defects Res A Clin Mol Teratol*. 2014;100(2):59-66.
